# Supplementary material
Source: PubMed Central journal article supplement (PMC9743802)

Disclosure Purpose: 22-11029

Summary of Interests

I do not have any interests to disclose at this time.

Additional Questions:

- 1. **Are there other relationships or activities that readers could perceive to have influenced, or that give the appearance of potentially influencing, what you wrote in the submitted work?**  
No.
- 2. **What is the manuscript title?**  
"Impact of Lifting Universal School Masking Requirements on Incidence of COVID-19 among Staff and Students: A Difference -in-Differences Analysis"
- 3. **Are you the corresponding author?**  
No.

Certification

I certify that the information provided in this disclosure is complete and accurate.

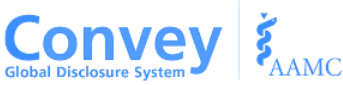

**Disclosure Purpose:** 22-11029

### Summary of Interests

I do not have any interests to disclose at this time.

### Additional Questions:

- Are there other relationships or activities that readers could perceive to have influenced, or that give the appearance of potentially influencing, what you wrote in the submitted work?**  
No.
- What is the manuscript title?**  
Impact of Lifting Universal School Masking Requirements on Incidence of COVID-19 among Staff and Students in Greater-Boston Area School Districts: A Difference-in-Differences Analysis
- Are you the corresponding author?**  
No.

### Certification

I certify that the information provided in this disclosure is complete and accurate.

Disclosure Purpose: 22-11029

## Summary of Interests

I do not have any interests to disclose at this time.

## Additional Questions:

1. **Are there other relationships or activities that readers could perceive to have influenced, or that give the appearance of potentially influencing, what you wrote in the submitted work?**

No.

2. **What is the manuscript title?**

Impact of Lifting Universal School Masking Requirements on Incidence of COVID-19 among Staff and Students: A Difference-in-Differences Analysis

3. **Are you the corresponding author?**

Yes.

- a. **Please list the other authors' names here.**

Dr. Eleanor J Murray, Boston University, Department of Epidemiology; Mr. Jaylen Clarke, Boston Public Health Commission; Dr. Mary T Bassett, FXB Center for Health & Human Rights, Harvard T.H. Chan School of Public Health; Dr. Bisola Ojikutu, Boston Public Health Commission; Dr. Sarimer Sánchez Boston Public Health Commission; \ Dr. Natalia Linos, FXB Center for Health & Human Rights, Harvard T.H.Chan School of Public Health; Dr. Kathryn Hall, Boston Public Health Commission;

## Certification

I certify that the information provided in this disclosure is complete and accurate.

**Disclosure Purpose:** 22-11029

### Summary of Interests

I do not have any interests to disclose at this time.

### Additional Questions:

- Are there other relationships or activities that readers could perceive to have influenced, or that give the appearance of potentially influencing, what you wrote in the submitted work?**  
No.
- What is the manuscript title?**  
Impact of Lifting Universal School Masking Requirements on Incidence of COVID-19 among Staff and Students: A Difference-in-Differences Analysis
- Are you the corresponding author?**  
No.

### Certification

I certify that the information provided in this disclosure is complete and accurate.

Disclosure Purpose: 22-11029

Summary of Interests

**Company or Organization**

| Entity                                                                    | Type  | Interest Held By                                                 |
|---------------------------------------------------------------------------|-------|------------------------------------------------------------------|
| Brookline Advisory Council on Public Health                               | Other | Self                                                             |
| <i>Category:</i> Other<br><i>Additional Information:</i> volunteer unpaid |       | <i>Description:</i> Chair of Advisory Board to Health Department |

Additional Questions:

- Are there other relationships or activities that readers could perceive to have influenced, or that give the appearance of potentially influencing, what you wrote in the submitted work?**

Yes.

  - Please describe those relationships.**

As Chair of the Brookline Advisory Council on Public Health I have a role to play in mask policy in Brookline, MA (an advisory unpaid volunteer role)
- What is the manuscript title?**

Impact of Lifting Universal School Masking Requirements on Incidence of COVID-19 among Staff and Students: A Difference-in-Differences Analysis
- Are you the corresponding author?**

No.

Certification

I certify that the information provided in this disclosure is complete and accurate.

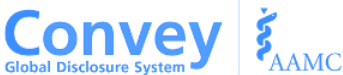

**Disclosure Purpose:** 22-11029

### Summary of Interests

I do not have any interests to disclose at this time.

### Additional Questions:

- Are there other relationships or activities that readers could perceive to have influenced, or that give the appearance of potentially influencing, what you wrote in the submitted work?**  
No.
- What is the manuscript title?**  
Impact of Lifting Universal School Masking Requirements on Incidence of COVID-19 among Staff and Students: A Difference-in-Differences Analysis
- Are you the corresponding author?**  
No.

### Certification

I certify that the information provided in this disclosure is complete and accurate.

**Disclosure Purpose:** 22-11029

**Summary of Interests**

I do not have any interests to disclose at this time.

**Additional Questions:**

- 1. **Are there other relationships or activities that readers could perceive to have influenced, or that give the appearance of potentially influencing, what you wrote in the submitted work?**  
No.
- 2. **What is the manuscript title?**  
Impact of Lifting Universal School Masking Requirements on Incidence of COVID-19 among Staff and Students: A Difference-in-Differences Analysis
- 3. **Are you the corresponding author?**  
No.

**Certification**

I certify that the information provided in this disclosure is complete and accurate.

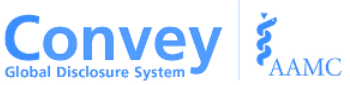

**Disclosure Purpose:** 22-11029

**Summary of Interests**

I do not have any interests to disclose at this time.

**Additional Questions:**

- 1. **Are there other relationships or activities that readers could perceive to have influenced, or that give the appearance of potentially influencing, what you wrote in the submitted work?**  
No.
- 2. **What is the manuscript title?**  
Impact of Lifting Universal School Masking Requirements on Incidence of COVID-19 among Staff and Students: A Difference-in-Differences Analysis
- 3. **Are you the corresponding author?**  
No.

**Certification**

I certify that the information provided in this disclosure is complete and accurate.



Supplement: NEJMoa2211029_disclosures.pdf [file NEJMoa2211029_disclosures.pdf]
